# Supplementary material for: GPD1 and ADH3 Natural Variants Underlie Glycerol Yield Differences in Wine Fermentation
Source: Front Microbiol. 2018 Jul 3;9:1460. doi: 10.3389/fmicb.2018.01460 (PMC6037841; doi:10.3389/fmicb.2018.01460)
Supplement: TABLE S4 — Reciprocal hemizygotes’ physico-chemical characteristics of must after fermentations. [file Table_4.XLSX]

## Sheet: GPD1
Table S4. Reciprocal hemizygotes' physico-chemical characteristics of must after 10 mL fermentations
Strain	Replicate	Malic Acid	Succinic Acid	Lactic Acid	Acetic Acid	Trehalose	Glucose	Fructose	Glycerol	Ethanol	Ethanol yield	Glycerol yield
NA-gpd1D/WE-GPD1	1	0.145615	0.525214	0.347327	1.9523	0.969066	18.9709	50.8622	9.19814	9.80308	0.378683	0.0450335
	2	ND	0.69731	0.293281	2.10719	0.9699	3.72558	27.4913	10.1684	13.2451	0.430293	0.0418681
	3	ND	0.712393	0.150867	2.29101	0.96675	2.41866	23.9917	10.7634	11.7172	0.373269	0.043458
	4	ND	0.698617	0.136185	2.24091	0.931507	2.38111	23.6228	10.5351	11.5217	0.366438	0.0424667
WE-gpd1D/NA-GPD1	1	ND	0.88217	0.397117	2.52844	1.03178	9.7644	52.7984	13.4365	11.3014	0.421556	0.0635234
	2	ND	0.771492	0.207489	2.52784	1.00714	4.64096	37.8852	12.9536	12.5252	0.426778	0.055941
	3	0.0547288	0.585874	0.123975	2.30798	0.876551	16.7224	59.0176	12.2173	8.86495	0.352642	0.0615965
	4	0.0722371	0.651547	0.128904	2.44009	0.938707	18.155	63.5685	13.059	9.74886	0.399867	0.0678881
	Average GPD1-WE	0.145615	0.658384	0.231915	2.14785	0.959306	6.87405	31.492	10.1663	11.5718	0.387171	0.0432066
	Average GPD1-NA	0.063483	0.722771	0.214371	2.45109	0.963545	12.3207	53.3174	12.9166	10.6101	0.400211	0.0622373
	Mann Whitney test	-	0.3286	0.3286	0.0143	0.4143	0.1714	0.0286	0.0143	0.1714	0.4143	0.0143
	SM300	ND	ND	ND	0.281375	0.940233	139.285	134.799	ND	ND
WA-gpd1D/WE-GPD1	1	ND	0.147342	0.0705981	2.86777	1.04808	4.17475	27.928	10.4814	9.36962	0.305504	0.0433148
	2	ND	0.232686	0.106963	3.0201	1.10966	0.138151	16.9502	11.3269	11.1267	0.341601	0.0440745
	3	ND	0.0840792	0.0584052	2.78665	1.008	0.236497	16.0434	10.4185	9.74433	0.298222	0.0404127
	4	ND	0.131382	0.0697868	2.94069	1.06405	0.600523	17.9942	10.9624	9.39033	0.289992	0.0429076
WE-gpd1D/WA-GPD1	1	ND	0	0.0866228	4.05181	1.07962	12.2779	60.743	15.7682	8.70854	0.341735	0.0784243
	2	ND	0.149135	0.102347	3.45175	1.02029	4.87056	47.4135	14.4835	10.5879	0.37664	0.0652998
	3	ND	0	0.0682541	3.60718	0.955939	8.8577	56.5636	14.7306	10.3739	0.392261	0.0705955
	4	ND	0	0.0632381	3.51638	0.932089	8.64915	55.4936	14.4926	8.97467	0.337286	0.0690317
	Average GPD1-WE	-	0.148872	0.0764382	2.9038	1.05745	1.28748	19.7289	10.7973	9.90776	0.30883	0.0426774
	Average GPD1-WA	-	0.0372838	0.0801156	3.65678	0.996985	8.66382	55.0534	14.8687	9.66126	0.361981	0.0708378
	Mann Whitney test	-	0.1	0.9	0.0143	0.1714	0.0143	0.0143	0.0143	0.3286	0.0429	0.0143
SA-gpd1D/WE-GPD1	1	0.122657	0.311421	0.112559	2.42784	1.06623	1.81837	28.5523	9.91227	11.2953	0.365676	0.0406719
	2	0.139786	0.347183	0.127299	2.21738	1.081	12.8394	48.0543	9.37168	8.65483	0.320309	0.0439593
	3	0	0.226247	0.106314	2.49761	1.07015	0	14.2388	10.7219	9.67279	0.293707	0.0412626
	4	0	0.185038	0.0951288	2.27912	0.993651	0	13.0301	9.84539	8.07599	0.244086	0.037714
WE-gpd1D/SA-GPD1	1	0	0.228895	0.0900818	2.84258	1.03827	10.5452	68.9811	11.2772	11.1119	0.450628	0.0579635
	2	0.0886451	0.135121	0.101084	2.77004	1.00713	10.8997	70.7303	11.3456	9.47054	0.388262	0.0589526
	3	0	0.14044	0.0759316	2.76008	0.916646	8.42388	64.1874	11.3969	9.34187	0.365843	0.0565679
	4	0	0.101804	0.0611841	2.6217	0.861866	7.93357	60.7062	10.6514	8.97034	0.344502	0.0518457
	Average GPD1-WE	0.06	0.267472	0.110325	2.35549	1.05276	7.32886	25.9689	9.96281	9.42474	0.305944	0.0409019
	Average GPD1-SA	0.02	0.151565	0.0820703	2.7486	0.955977	9.45058	66.1513	11.1678	9.72367	0.387309	0.0563324
	Mann Whitney test	0.2143	0.0571	0.0286	0.0143	0.0571	0.1571	0.0143	0.0286	0.4143	0.0429	0.0143

## Sheet: ADH3
Table S4. Reciprocal hemizygotes' physico-chemical characteristics of must after 10 mL fermentations
Strain	Replicate	Malic Acid	Succinic Acid	Lactic Acid	Acetic Acid	Trehalose	Glucose	Fructose	Glycerol	Ethanol	Ethanol yield	Glycerol yield
NA-adh3D/WE-ADH3	1	0.18056	0.519494	0.170658	2.38618	0.854227	28.3677	76.0792	12.5261	8.53545	0.396993	0.0738406
	2	0	0.651117	0.154664	3.02858	1.09941	3.10195	34.5857	15.3783	11.1019	0.37054	0.065053
	3	0	0.439367	0.117153	2.73159	0.942889	11.5396	52.9414	13.4777	11.8707	0.446846	0.0643011
	4	0	0.365626	0.12055	2.68434	0.897021	11.1674	51.7733	13.1961	11.6736	0.436219	0.0624984
WE-adh3D/NA-ADH3	1	0.063433	0.81454	0.193359	2.31171	1.00776	3.73144	27.5513	12.0903	11.8611	0.385436	0.0497951
	2	0.0616147	0.853549	0.186168	2.33516	0.999831	2.66196	24.8456	12.8122	10.8139	0.346024	0.0519602
	3	0	0.678782	0.129181	1.99224	0.882961	4.84437	26.8185	10.8714	7.70003	0.25061	0.044845
	4	0	0.919838	0.165828	2.34757	1.01798	6.11595	32.4312	13.0665	9.69108	0.324631	0.0554754
	Average ADH3-WE	0.0451401	0.493901	0.140756	2.70767	0.948388	13.5441	53.8449	13.6445	10.7954	0.412649	0.0664233
	Average ADH3-NA	0.0312619	0.816677	0.168634	2.24667	0.977133	4.33843	27.9116	12.2101	10.0165	0.326675	0.0505189
	Mann Whitney test	0.5	0.0143	0.1	0.0143	0.3286	0.1	0.0143	0.0571	0.2429	0.0286	0.0143
	SM300	ND	ND	ND	0.281375	0.940233	139.285	134.799	ND	ND
WA-adh3D/WE-ADH3	1	-	-	0.0681919	3.22208	0.992411	9.56398	41.2282	12.5707	9.97735	0.352549	0.0562973
	2	-	-	0.0756002	3.30365	1.00087	-0.732313	10.6859	13.897	12.5763	0.375676	0.0526143
	3	-	-	0.0523363	3.55953	1.03472	3.2291	28.3846	13.6723	11.4181	0.371545	0.0563874
	4	-	-	0.0687995	3.42737	1.02331	1.6151	23.2562	13.9647	9.26788	0.293419	0.0560354
WE-adh3D/WA-ADH3	1	-	-	0.0783791	3.77131	0.95471	21.2633	73.5131	14.5705	7.73745	0.340468	0.08126
	2	-	-	0.0535618	3.77238	1.08179	22.5314	73.6462	14.2699	7.56349	0.335435	0.0802102
	3	-	-	0.0581221	3.99812	0.992038	12.8998	63.2832	15.8224	7.73197	0.308261	0.0799513
	4	-	-	0.0645016	4.00532	0.98419	12.8733	63.2198	15.8468	7.70006	0.30685	0.080038
	Average ADH3-WE	-	-	0.066232	3.37816	1.01283	3.41897	25.8887	13.5262	10.8099	0.348297	0.0553336
	Average ADH3-WA	-	-	0.0636412	3.88678	1.00318	17.392	68.4156	15.1274	7.68324	0.322754	0.0803649
	Mann Whitney test	-	-	0.4143	0.0143	0.1857	0.0143	0.0143	0.0143	0.0143	0.1714	0.0143
SA-adh3D/WE-ADH3	1	0	0.304734	0.102112	2.4957	1.03133	-0.878934	15.9584	10.1644	11.4441	0.34862	0.0392443
	2	0.0504954	0.326521	0.0950529	2.52764	1.06787	-0.854315	16.6245	10.2708	9.95302	0.304008	0.0397609
	3	0	0.278353	0.0930058	2.20441	1.02369	0.544492	27.164	9.44333	9.81276	0.314247	0.038329
	4	0	0.311404	0.0971276	2.19866	1.0423	0.516109	27.8017	9.65134	10.8175	0.34728	0.0392704
WE-adh3D/SA-ADH3	1	0.114282	0.264062	0.114592	3.05384	1.08459	12.2867	70.7399	13.3977	9.6101	0.396864	0.0701241
	2	0	0.222955	0.0716993	3.38819	0.996472	4.647	55.175	14.245	13.0936	0.482161	0.0664842
	3	0	0.176116	0.0993163	2.72861	0.909413	7.63236	56.827	12.4218	9.51601	0.35817	0.0592574
	4	0	0.212884	0.107581	2.95605	0.957355	8.47638	62.0395	13.4989	10.2003	0.395349	0.0663117
	Average ADH3-WE	0.0126238	0.305253	0.0968247	2.3566	1.0413	-0.168162	21.8871	9.88248	10.5068	0.328539	0.0391512
	Average ADH3-SA	0.0285704	0.219004	0.098297	3.03167	0.986956	8.26061	61.1953	13.3909	10.605	0.408136	0.0655444
	Mann Whitney test	0.5	0.0143	0.2429	0.0143	0.1714	0.0143	0.0143	0.0143	0.3286	0.0143	0.0143

## Sheet: Microfermentations_GPD1
Table S4. Reciprocal hemizygotes' physico-chemical characteristics of must after 200 uL fermentations
Strain	Replicate	Glucose	Fructose	Glycerol	Ethanol	Ethanol yield	Glycerol yield
NA-gpd1D/WE-GPD1	1	36.356	82.8409	7.35293	8.99988	0.443182	0.0458912
	2	15.4034	57.5609	8.72255	11.7458	0.448876	0.0422486
	3	11.4421	50.2627	8.89083	12.7265	0.461202	0.0408365
WE-gpd1D/NA-GPD1	1	3.70702	33.0588	9.32405	13.1873	0.428788	0.0384249
	2	3.14007	32.1839	10.1459	14.3352	0.463357	0.0415647
	3	10.2303	45.029	8.87175	12.6229	0.444297	0.0395773
	Average GPD1-WE	21.0672	63.5548	8.3221	11.1574	0.451087	0.0429921
	Average GPD1-NA	5.69247	36.7572	9.44722	13.3818	0.445481	0.0398556
	Mann Whitney test	0.05	0.05	0.1	0.1	0.45	0.1
	SM300	136.753	142.67	ND	ND
WA-gpd1D/WE-GPD1	1	7.40401	44.1922	7.38882	13.9247	0.482235	0.0324319
	2	0	16.2886	7.50846	14.3177	0.429313	0.0285348
	3	11.8168	53.4345	7.10263	12.779	0.470774	0.0331634
WE-gpd1D/WA-GPD1	1	1.7845	30.8857	9.74091	14.4688	0.462645	0.0394765
	2	1.29194	28.4286	10.2757	14.8901	0.470492	0.0411518
	3	2.23754	31.0554	10.3334	14.4633	0.46364	0.0419837
	Average GPD1-WE	6.40695	37.9718	7.3333	13.6738	0.460774	0.0313767
	Average GPD1-WA	1.77132	30.1232	10.1167	14.6074	0.465592	0.0408707
	Mann Whitney test	0.35	0.35	0.05	0.05	0.35	0.05
SA-gpd1D/WE-GPD1	1	18.9709	50.8622	9.19814	9.80308	0.471453	0.0324857
	2	3.72558	27.4913	10.1684	13.2451	0.480816	0.0301592
	3	2.41866	23.9917	10.7634	11.7172	0.481979	0.0261095
WE-gpd1D/SA-GPD1	1	9.7644	52.7984	13.4365	11.3014	0.474555	0.0379195
	2	4.64096	37.8852	12.9536	12.5252	0.485043	0.034691
	3	16.7224	59.0176	12.2173	8.86495	0.459853	0.0364697
	Average GPD1-WE	8.3717	34.115	10.0433	11.5885	0.478083	0.0295848
	Average GPD1-SA	10.3759	49.9004	12.8691	10.8972	0.47315	0.0363601
	Mann Whitney test	0.35	0.1	0.05	0.35	0.45	0.05
